# Supplementary material
Source: PubMed Central journal article supplement (PMC6437559)
Supplement: NIHMS890808-supplement-1.pdf [file NIHMS890808-supplement-1.pdf]

## Supplemental Materials

Table S1

| Primers                                        | sequences (5'-3')                                                    | Use           |
|------------------------------------------------|----------------------------------------------------------------------|---------------|
| Cyto- $\gamma$ -actin promoter (-773+37) (rat) | TGGAGAGCAGTCTCGCCA<br>ACTG<br>TGTAAGCCGGCGGCGAAGTG                   | Cloning       |
| Cytoplasmic $\gamma$ -actin (rat)              | ATGGAAGAAGAAATCGCCG<br>CCCC<br>GAGAGCACCGCCTGAATGGCC                 | Cloning/RPA   |
| Cytoplasmic $\gamma$ -actin CArG (rat)         | GAAAGATCGCCATATATGGACATGTTT<br>C<br>GAACATGTCCATATATGGCGATCTTTT<br>C | EMSA          |
| Cytoplasmic $\gamma$ -actin muCArG (rat)       | GAAAGATCGTTATATATGGACATGTTT<br>C<br>GAACATGTCCATATATAACGATCTTTT<br>C | EMSA          |
| $\beta$ -actin promoter (-739+18) (rat)        | TTCTAGGTCCGGGGCAGAGG<br>TGGACGCGGACTCGACAGTG                         | Cloning       |
| $\beta$ -actin promoter (rat)                  | ATGGATGACGATATCGCTGCGC<br>GGTCATCTTTTTCACGGTTGGCC                    | Cloning/RPA   |
| $\beta$ -actin CArG (rat)                      | CCGAAAGTTGCCTTTTATGGCTCGAGTG<br>CACTCGAGCCATAAAAGGCAACTTTTCGG        | EMSA          |
| $\beta$ -actin muCArG (rat)                    | CCGAAAGTTGTTTTTTATGGCTCGAGTG<br>CACTCGAGCCATAAAAAACA<br>ACTTTTCGG    | EMSA          |
| SM $\alpha$ -actin promoter (-671+5)           | ACATGCACGTGGACTGTACC<br>GTGTCTGGGGAGGCTGAATG                         | Cloning       |
| SM $\alpha$ -actin CArG-A (rat)                | GTCTTTGCTCCTTGTTTGGGAAGCGAG<br>CTCGCTTCCCAAACAAGGAGCAAAGAC           | EMSA          |
| SM $\alpha$ -actin muCArG-A (rat)              | GTCTTTGCTTTTTTGGTTTGGGAAGCGAG<br>CTCGCTTCCCAAACAAAAGCAAAGAC          | EMSA          |
| SM $\alpha$ -actin CArG-B (rat)                | GCTGAGGTCCCTATATGGTTGTGTTAG<br>CTAACACAACCATATAGGGACCTCAGC           | EMSA          |
| SM $\alpha$ -actin muCArG-B (rat)              | GCTGAGGTCTTTATATGGTTGTGTTAG<br>CTAACACAACCATATAAAGACCTCAGC           | EMSA          |
| Myocardin (rat)                                | CAGTTACGGCTTCAACAGAGAAGG<br>GCTTCATCTGAGCAGTTGGAATGG                 | mRNA splicing |
| Myocardin (rat)                                | CTGTGTGGAGTCCTCAGGTCAAACC<br>GATGTGTTGCGGGCTCTTCAG                   | RT-PCR        |
| SRF (rat)                                      | TCTCAGGCACCATCCACCAT<br>CCCAGCTTGCTGCTCCTATCAC                       | RT-PCR        |
| SM $\alpha$ -actin (rat/mouse)                 | GTGTGAAGAGGAAGACAGCAC<br>GTGATGATGCCGTGTTCTATCG                      | RT-PCR        |
| Col.1 $\alpha$ 1 (rat/mouse)                   | TCAGCCACCTCAAGAGAAGTC<br>CTGCGGATGTTCTCAATCTGC                       | RT-PCR        |
| GAPDH                                          | TGCACCACCAACTGCTAAGC<br>GGCATGGACTGTGGTCATGAG                        | RT-PCR        |
| Col.1 $\alpha$ 2 promoter (mouse)<br>(-433+55) | CACAGAGTGAAGCGGGACTG<br>GCAATCGTGGACCGTTCC                           | Cloning       |
| Col.1 $\alpha$ 1 promoter (mouse)<br>(-479+50) | CCTCCAACAGGCACATCTGC<br>CGAGGAGAACTCCCCTCTGC                         | Cloning       |

## Supplemental figures

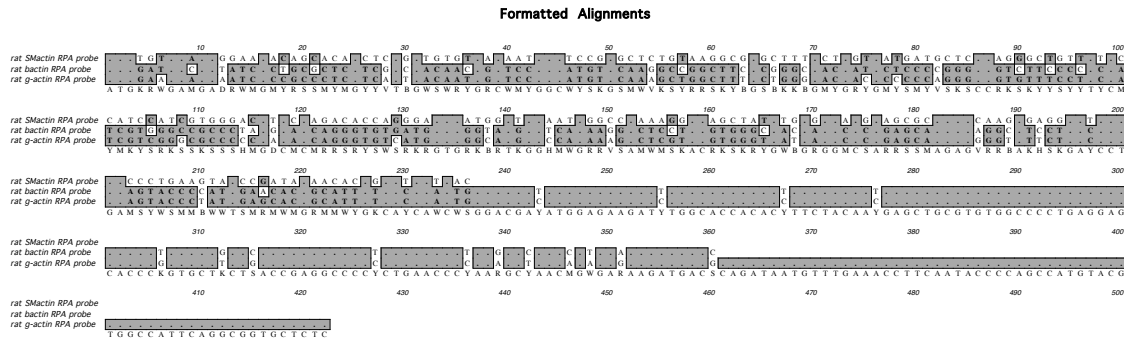

Figure S1. A formatted alignment of partial actin isoform sequences for RPA probes. Rat SM  $\alpha$ -actin (236bp) (Genbank accession number: NM\_031004),  $\beta$ -actin (360bp) (Genbank accession number: NM\_031144.2) and cytoplasmic  $\gamma$ -actin (422bp) (NM\_001127449) were cloned from rat hepatic myofibroblasts and ligated in to pGEM-7zf(+) vector (Promega). RPA probe sequences were shown. The mismatches were indicated by capital letters.

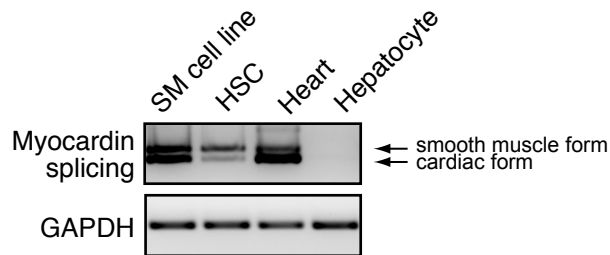

Figure S2. Hepatic myofibroblasts primarily express a smooth muscle form of myocardin. Reverse transcription PCR was performed using total RNAs from rat smooth muscle cell line, rat hepatic myofibroblasts (activated hepatic stellate cells), mouse heart tissue and rat hepatocytes. The PCR primers were designed as described before<sup>1</sup>. Myocardin mRNA splicing bands were indicated by arrows. GAPDH was used as control.

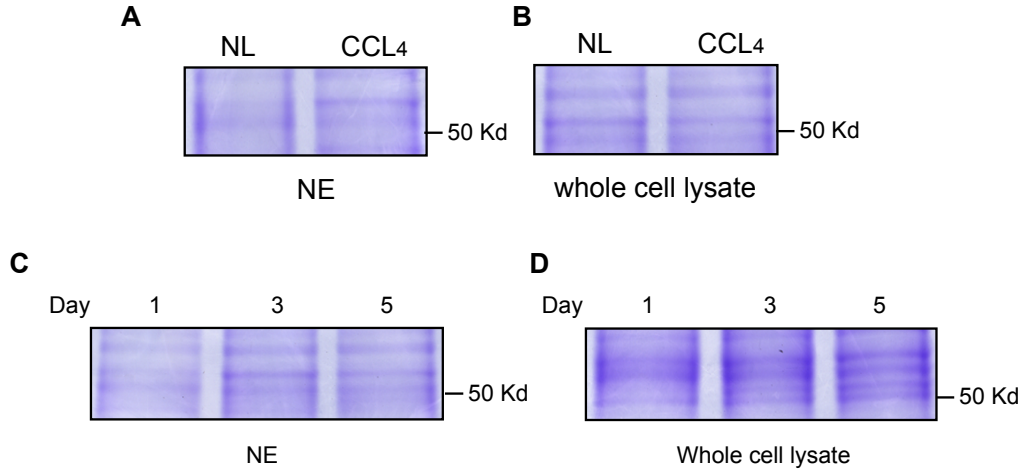

Figure S3. Coomassie blue staining used as additional immunoblotting loading control. (A) 10 $\mu$ g of the nuclear extracts (NE) were subjected to sodium dodecyl sulfate polyacrylamide gel electrophoresis (SDS-PAGE, 4–12%, Invitrogen) and then stained with R-250 coomassie blue (Biorad) according to manufacture’s instruction. (B) Whole cell lysates (10 $\mu$ g) from hepatic stellate cells of normal and fibrotic rat liver were subjected to SDS-PAGE and coomassie blue staining as in (A). (C) HSCs from normal rat liver were cultured as indicated. 10 $\mu$ g nuclear extracts (NE) or whole cell lysates (D) were subjected to SDS-PAGE and coomassie blue staining. Representative images from 50-70 Kd regions were shown.

Reference:

- 1 Creemers EE, Sutherland LB, Oh J, *et al.* Coactivation of MEF2 by the SAP domain proteins myocardin and MASTR. *Molecular cell* 2006;23(1):83-96.
